# Supplementary material for: A revised temperature-dependent remineralization scheme for the Community Earth System Model (v1.2.2)
Source: Copernicus journal article supplement (doi:10.5194/gmd-19-1143-2026), 2026-02-03
Supplement: Supplementary file 1 [file gmd-19-1143-2026-supplement.pdf]

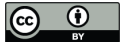

*Supplement of*

## **A revised temperature-dependent remineralization scheme for the Community Earth System Model (v1.2.2)**

**Elizabeth K. Brabson et al.**

*Correspondence to:* Elizabeth K. Brabson ([liz.brabson@yale.edu](mailto:liz.brabson@yale.edu))

The copyright of individual parts of the supplement might differ from the article licence.

# Supplemental Materials

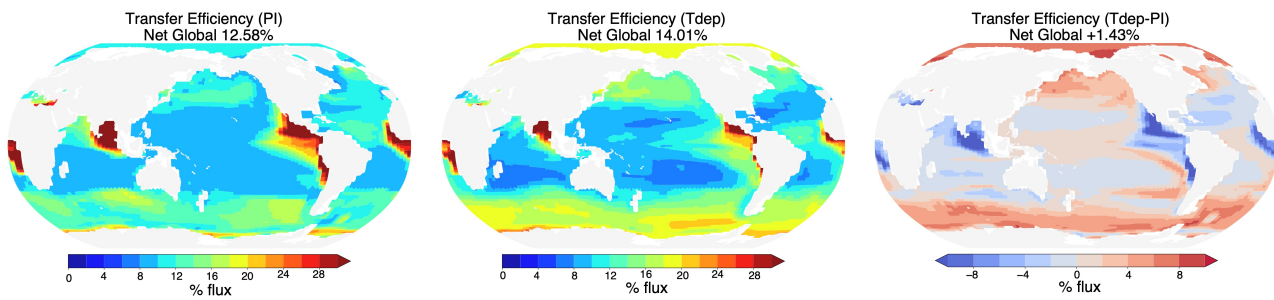

**Figure S1. Global transfer efficiency map.** Low-resolution configuration for PI control (left) and Tdep simulations (center), as well as difference (right). Net global transfer efficiency is noted.

5

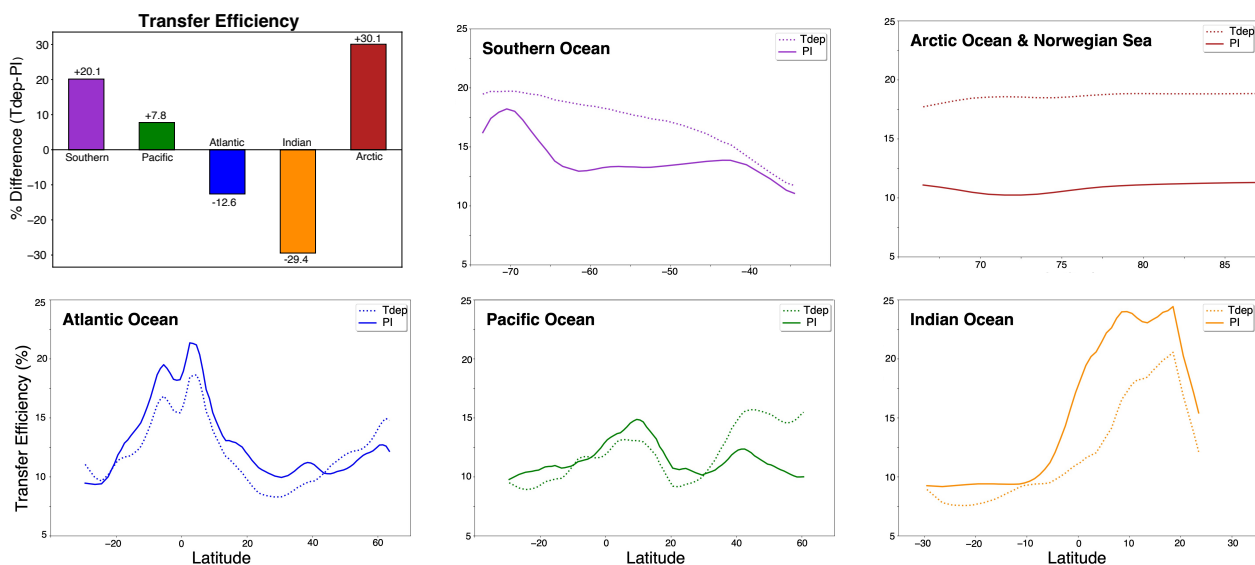

**Figure S2. Zonally averaged transfer efficiency.** Global assessment of zonally averaged transfer efficiency for low-resolution simulations. Inset shows basin-scale average for transfer efficiency by latitudinal band.

10

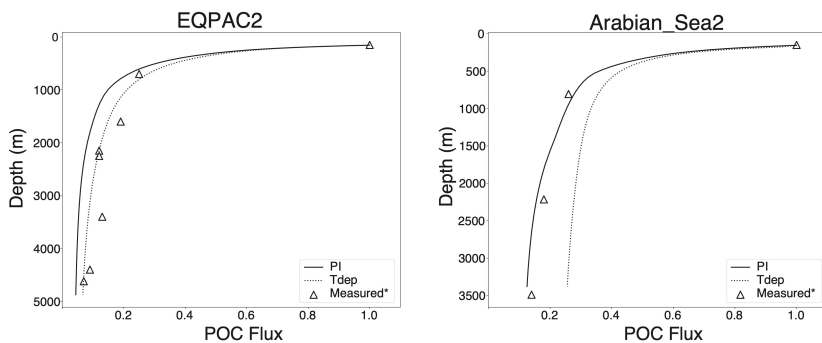

**Figure S3. Zonally averaged transfer efficiency.** Low-resolution results for two sites differing from high-resolution simulation.

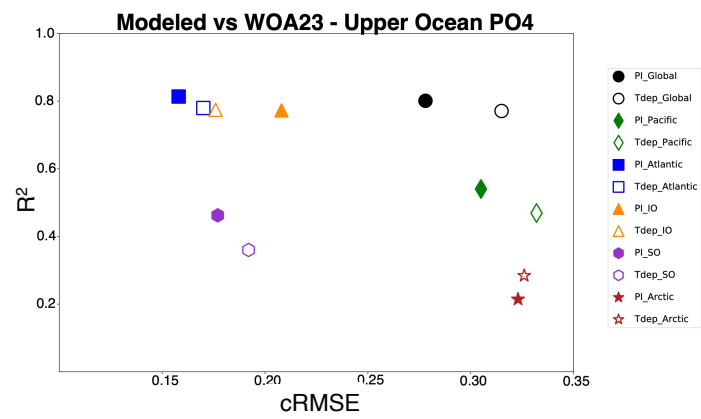

**Figure S4. Upper ocean PO4.** Low-resolution results for averaged upper 100 meters versus WOA23.
